# Supplementary material for: Predictive value of chemotherapy-related high-density lipoprotein cholesterol (HDL) elevation in patients with colorectal cancer receiving adjuvant chemotherapy: an exploratory analysis of 851 cases
Source: PubMed Central journal article supplement (PMC5302989; doi:10.18632/oncotarget.10145), 2016-06-17
Supplement: oncotarget-07-57290-s001.pdf [file oncotarget-07-57290-s001.pdf]

## Predictive value of chemotherapy-related high-density lipoprotein cholesterol (HDL) elevation in patients with colorectal cancer receiving adjuvant chemotherapy: an exploratory analysis of 851 cases

### Supplementary Material

**STable 1: Chemotherapy-related lipid alterations in different subgroups.**

|                       | Pre-CT    | Post-CT   | Difference <sup>1</sup> | P value <sup>ϕ</sup> |
|-----------------------|-----------|-----------|-------------------------|----------------------|
| <b>≤ 65 year</b>      |           |           |                         |                      |
| Cholesterol (mmol/L)  | 4.88±0.96 | 5.06±0.98 | 0.18±1.01               | < <b>0.001</b>       |
| Triglyceride (mmol/L) | 1.39±0.89 | 1.69±0.99 | 0.29±1.10               | < <b>0.001</b>       |
| HDL-C (mmol/L)        | 1.14±0.30 | 1.37±0.38 | 0.22±0.36               | < <b>0.001</b>       |
| LDL-C (mmol/L)        | 3.09±0.85 | 2.95±0.89 | -0.14±0.89              | < <b>0.001</b>       |
| ApoA- I (g/L)         | 1.17±0.39 | 1.35±0.29 | 0.18±0.44               | < <b>0.001</b>       |
| ApoB (g/L)            | 0.97±0.53 | 0.91±0.25 | -0.06±0.52              | <b>0.006</b>         |
| <b>&gt; 65 year</b>   |           |           |                         |                      |
| Cholesterol (mmol/L)  | 5.08±1.05 | 5.23±1.10 | 0.16±1.15               | 0.172                |
| Triglyceride (mmol/L) | 1.50±0.84 | 1.77±1.09 | 0.28±0.98               | <b>0.005</b>         |
| HDL-C (mmol/L)        | 1.17±0.30 | 1.37±0.32 | 0.20±0.35               | < <b>0.001</b>       |
| LDL-C (mmol/L)        | 3.21±0.89 | 3.02±0.99 | -0.19±1.04              | 0.067                |
| ApoA- I (g/L)         | 1.23±0.27 | 1.40±0.27 | 0.17±0.31               | < <b>0.001</b>       |
| ApoB (g/L)            | 1.01±0.26 | 0.98±0.30 | -0.03±0.30              | 0.349                |
| <b>Stage II</b>       |           |           |                         |                      |
| Cholesterol (mmol/L)  | 4.87±0.93 | 5.02±0.92 | 0.15±0.96               | <b>0.010</b>         |
| Triglyceride (mmol/L) | 1.40±0.81 | 1.78±1.07 | 0.37±0.97               | < <b>0.001</b>       |
| HDL-C (mmol/L)        | 1.15±0.30 | 1.37±0.36 | 0.22±0.34               | < <b>0.001</b>       |
| LDL-C (mmol/L)        | 3.02±0.83 | 2.87±0.85 | -0.15±0.89              | <b>0.005</b>         |
| ApoA- I (g/L)         | 1.19±0.46 | 1.37±0.26 | 0.18±0.49               | < <b>0.001</b>       |
| ApoB (g/L)            | 0.96±0.47 | 0.90±0.24 | -0.06±0.46              | <b>0.021</b>         |
| <b>Stage III</b>      |           |           |                         |                      |
| Cholesterol (mmol/L)  | 4.94±1.00 | 5.14±1.05 | 0.20±1.08               | < <b>0.001</b>       |
| Triglyceride (mmol/L) | 1.41±0.93 | 1.64±0.95 | 0.23±1.16               | < <b>0.001</b>       |
| HDL-C (mmol/L)        | 1.14±0.31 | 1.37±0.37 | 0.23±0.37               | < <b>0.001</b>       |
| LDL-C (mmol/L)        | 3.17±0.87 | 3.03±0.94 | -0.15±0.93              | <b>0.002</b>         |
| ApoA- I (g/L)         | 1.17±0.29 | 1.35±0.30 | 0.18±0.37               | < <b>0.001</b>       |
| ApoB (g/L)            | 0.99±0.52 | 0.94±0.27 | -0.05±0.52              | 0.060                |
| <b>G1</b>             |           |           |                         |                      |
| Cholesterol (mmol/L)  | 4.74±1.00 | 5.01±1.04 | 0.27±1.06               | <b>0.002</b>         |
| Triglyceride (mmol/L) | 1.35±0.60 | 1.77±0.90 | 0.42±0.89               | < <b>0.001</b>       |
| HDL-C (mmol/L)        | 1.10±0.30 | 1.35±0.36 | 0.25±0.37               | < <b>0.001</b>       |
| LDL-C (mmol/L)        | 2.99±0.86 | 2.87±0.92 | -0.11±0.90              | 0.136                |

|                                 |           |           |            |                |
|---------------------------------|-----------|-----------|------------|----------------|
| ApoA- I (g/L)                   | 1.18±0.60 | 1.33±0.30 | 0.15±0.65  | <b>0.006</b>   |
| ApoB (g/L)                      | 0.93±0.32 | 0.90±0.26 | -0.03±0.28 | 0.138          |
| <b>G2-3</b>                     |           |           |            |                |
| Cholesterol (mmol/L)            | 4.96±0.96 | 5.11±0.99 | 0.15±1.02  | <b>0.001</b>   |
| Triglyceride (mmol/L)           | 1.43±0.95 | 1.68±1.03 | 0.25±1.13  | < <b>0.001</b> |
| HDL-C (mmol/L)                  | 1.16±0.30 | 1.37±0.37 | 0.21±0.36  | < <b>0.001</b> |
| LDL-C (mmol/L)                  | 3.14±0.86 | 2.99±0.90 | -0.16±0.91 | < <b>0.001</b> |
| ApoA- I (g/L)                   | 1.18±0.27 | 1.36±0.28 | 0.19±0.33  | < <b>0.001</b> |
| ApoB (g/L)                      | 0.99±0.54 | 0.93±0.26 | -0.06±0.54 | <b>0.009</b>   |
| <b>Male</b>                     |           |           |            |                |
| Cholesterol (mmol/L)            | 4.84±0.98 | 5.05±1.01 | 0.21±1.05  | < <b>0.001</b> |
| Triglyceride (mmol/L)           | 1.45±0.92 | 1.75±1.09 | 0.30±1.14  | < <b>0.001</b> |
| HDL-C (mmol/L)                  | 1.10±0.30 | 1.32±0.35 | 0.21±0.35  | < <b>0.001</b> |
| LDL-C (mmol/L)                  | 3.06±0.87 | 2.96±0.92 | -0.10±0.92 | <b>0.026</b>   |
| ApoA- I (g/L)                   | 1.15±0.41 | 1.33±0.27 | 0.18±0.45  | < <b>0.001</b> |
| ApoB (g/L)                      | 0.98±0.60 | 0.92±0.27 | -0.06±0.59 | 0.056          |
| <b>Female</b>                   |           |           |            |                |
| Cholesterol (mmol/L)            | 5.04±0.95 | 5.16±0.98 | 0.12±1.00  | <b>0.06</b>    |
| Triglyceride (mmol/L)           | 1.34±0.82 | 1.61±0.84 | 0.27±0.98  | < <b>0.001</b> |
| HDL-C (mmol/L)                  | 1.22±0.30 | 1.45±0.38 | 0.23±0.38  | < <b>0.001</b> |
| LDL-C (mmol/L)                  | 3.19±0.83 | 2.96±0.89 | -0.22±0.90 | < <b>0.001</b> |
| ApoA- I (g/L)                   | 1.22±0.30 | 1.40±0.30 | 0.18±0.37  | < <b>0.001</b> |
| ApoB (g/L)                      | 0.98±0.24 | 0.92±0.24 | -0.06±0.25 | < <b>0.001</b> |
| <b>&lt; 24 kg/m<sup>2</sup></b> |           |           |            |                |
| Cholesterol (mmol/L)            | 4.88±0.95 | 5.04±0.99 | 0.15±1.04  | <b>0.002</b>   |
| Triglyceride (mmol/L)           | 1.35±0.93 | 1.60±0.93 | 0.26±1.09  | < <b>0.001</b> |
| HDL-C (mmol/L)                  | 1.18±0.31 | 1.40±0.38 | 0.22±0.37  | < <b>0.001</b> |
| LDL-C (mmol/L)                  | 3.06±0.83 | 2.90±0.87 | -0.16±0.90 | < <b>0.001</b> |
| ApoA- I (g/L)                   | 1.19±0.26 | 1.36±0.29 | 0.17±0.33  | < <b>0.001</b> |
| ApoB (g/L)                      | 0.98±0.59 | 0.90±0.25 | -0.07±0.57 | <b>0.007</b>   |
| <b>≥ 24 kg/m<sup>2</sup></b>    |           |           |            |                |
| Cholesterol (mmol/L)            | 4.97±1.02 | 5.20±1.01 | 0.22±1.00  | <b>0.001</b>   |
| Triglyceride (mmol/L)           | 1.53±0.76 | 1.89±1.11 | 0.36±1.07  | < <b>0.001</b> |
| HDL-C (mmol/L)                  | 1.07±0.27 | 1.30±0.32 | 0.23±0.33  | < <b>0.001</b> |
| LDL-C (mmol/L)                  | 3.20±0.91 | 3.08±0.95 | -0.11±0.93 | <b>0.068</b>   |
| ApoA- I (g/L)                   | 1.16±0.53 | 1.34±0.27 | 0.18±0.57  | < <b>0.001</b> |
| ApoB (g/L)                      | 0.98±0.25 | 0.97±0.26 | -0.02±0.27 | 0.298          |
| <b>FOLFOX/CAPEOX</b>            |           |           |            |                |
| Cholesterol (mmol/L)            | 4.89±0.96 | 5.10±0.99 | 0.21±1.02  | < <b>0.001</b> |
| Triglyceride (mmol/L)           | 1.41±0.92 | 1.67±0.97 | 0.26±1.08  | < <b>0.001</b> |
| HDL-C (mmol/L)                  | 1.14±0.29 | 1.38±0.38 | 0.24±0.36  | < <b>0.001</b> |
| LDL-C (mmol/L)                  | 3.10±0.85 | 2.96±0.88 | -0.14±0.90 | < <b>0.001</b> |
| ApoA- I (g/L)                   | 1.16±0.28 | 1.35±0.29 | 0.19±0.34  | < <b>0.001</b> |
| ApoB (g/L)                      | 0.98±0.53 | 0.92±0.25 | -0.06±0.52 | <b>0.007</b>   |

**5-Fu+LV/capecitabine**

|                       |           |           |            |                |
|-----------------------|-----------|-----------|------------|----------------|
| Cholesterol (mmol/L)  | 5.00±1.00 | 5.09±1.00 | 0.84±1.01  | 0.443          |
| Triglyceride (mmol/L) | 1.41±0.63 | 1.91±1.25 | 0.50±1.15  | < <b>0.001</b> |
| HDL-C (mmol/L)        | 1.22±0.33 | 1.33±0.31 | 0.11±0.34  | <b>0.003</b>   |
| LDL-C (mmol/L)        | 3.22±0.89 | 2.97±1.03 | -0.25±0.97 | <b>0.018</b>   |
| ApoA- I (g/L)         | 1.30±0.73 | 1.39±0.23 | 0.94±0.77  | 0.260          |
| ApoB (g/L)            | 1.01±0.27 | 0.96±0.29 | -0.05±0.29 | <b>0.090</b>   |

---

HDL-C = high-density lipoprotein cholesterol, LDL-C = low-density lipoprotein cholesterol, ApoA-I = apolipoprotein A-I, ApoB = apolipoprotein B, CT = chemotherapy. Data are mean ± standard deviations. ¶Difference = lipids<sub>post-CT</sub> - lipids<sub>pre-CT</sub>. φCompared with paired t-test.

**STable 2: Prognostic factor definition according to internal validation.**

| Variables                    | Mean HR | SD   | Replication Rate (%) |
|------------------------------|---------|------|----------------------|
| <b>Disease-free survival</b> |         |      |                      |
| Location of primary tumor    | 0.64    | 0.02 | 50                   |
| T-stage                      | 2.15    | 0.33 | 95                   |
| N-stage                      | 2.61    | 0.30 | 100                  |
| pre-operative CA19-9         | 1.65    | 0.11 | 50                   |
| HDL-C elevation              | 0.58    | 0.05 | 84                   |
| <b>Overall survival</b>      |         |      |                      |
| Age                          | 1.90    | 0.16 | 88                   |
| Gender                       | 1.78    | 0.15 | 76                   |
| Location of primary tumor    | 0.55    | 0.05 | 96                   |
| N-stage                      | 2.59    | 0.40 | 100                  |
| pre-operative CA19-9         | 1.75    | 0.13 | 67                   |
| HDL-C elevation*             | 0.56    | 0.06 | 86                   |

HR = hazard ratio; SD = standard deviations. \*Comparision between before and after chemotherapy.
